# Supplementary material for: Fe–N–C catalyst with atomic Fe dispersion and hierarchical porosity via PVP-assisted MOF synthesis for ORR in acidic media
Source: Royal Society of Chemistry journal article supplement (doi:10.1039/d5ra05653e), 2025-01-01
Supplement: d5ra05653e1.pdf [file d5ra05653e1.pdf]

## SUPPLEMENTARY INFORMATION

### Fe–N–C Catalyst with Atomic Fe Dispersion and Hierarchical Porosity via PVP-Assisted MOF Synthesis for ORR in Acidic Media

Muhammad Shoaib,<sup>a</sup> Shagufta Ishtiaque,<sup>a</sup> Ahsan Abdul Ghani,<sup>\*a</sup> Awan Zahoor,<sup>b</sup> Abid Ali,<sup>c</sup> Ayisha Rubab<sup>a</sup> and Maaz Akhtar<sup>d</sup>

<sup>a</sup>Department of Chemical Engineering, University of Karachi, Karachi, Pakistan

<sup>b</sup>Department of Food Engineering, NED University of Engineering and Technology, Karachi, Pakistan

<sup>c</sup>Chongqing Key Laboratory for Advanced Materials and Technologies of Clean Energies, School of Materials and Energy, Southwest University, Chongqing 400715, PR China

<sup>d</sup>Industrial Engineering Department, College of Engineering, Imam Mohammad Ibn Saud Islamic University (IMSIU), Riyadh, KSA

## Experimental Section

### Materials

2-Methylimidazole (MeIm, C<sub>4</sub>H<sub>6</sub>N<sub>2</sub>, 99%), polyvinylpyrrolidone (PVP, M.W. ~10,000), zinc nitrate hexahydrate (Zn(NO<sub>3</sub>)<sub>2</sub>·6H<sub>2</sub>O, 99%), and iron(III) nitrate nonahydrate (Fe(NO<sub>3</sub>)<sub>3</sub>·9H<sub>2</sub>O, 98%) were all purchased from Sigma-Aldrich. Nafion solution (5 wt%) and sulfuric acid (H<sub>2</sub>SO<sub>4</sub>, 98%) were obtained from Alfa Aesar. Methanol and ethanol were of analytical grade. All reagents were used as received without further purification, and ultrapure water (18.2 MΩ·cm) was used in all procedures where applicable.

### Structural and Morphological Characterization

X-ray diffraction (XRD) patterns were collected using a PANalytical X'Pert PRO diffractometer equipped with Cu K $\alpha$  radiation ( $\lambda = 1.5406 \text{ \AA}$ ) to analyze the crystallographic structure of the catalysts. Scans were performed over a  $2\theta$  range of  $10^\circ$  to  $80^\circ$  at a rate of  $4^\circ \text{ min}^{-1}$  with a 0.2 s step time. Surface morphology was examined using field-emission scanning electron microscopy (FESEM, Zeiss Ultra55) operating at an accelerating voltage of 5 kV. Transmission electron microscopy (TEM) imaging was performed on a Hitachi H-9500 microscope at an accelerating voltage of 300 kV to probe internal microstructures and particle dispersity.

### Textural and Surface Area Analysis

Nitrogen adsorption–desorption isotherms were measured at 77 K using a Quantachrome Autosorb-1-C surface area analyzer. Prior to measurements, all samples were degassed under vacuum ( $\sim 10^{-6}$  Pa) at 200 °C for 2 h. The Brunauer–Emmett–Teller (BET) method was used to determine the specific surface area, while micropore volumes and areas were estimated using t-plot and Dubinin–Radushkevich (DR) models. Pore size distributions were derived using both the Barrett–Joyner–Halenda (BJH) and density functional theory (DFT) models applied to the adsorption branches of the isotherms.

### X-ray Photoelectron Spectroscopy (XPS)

XPS analysis was conducted using a PHI-5000C ESCA system (PerkinElmer) with Mg K $\alpha$  radiation ( $h\nu = 1253.6 \text{ eV}$ ) to evaluate surface elemental composition and chemical states. The spectra were processed, fitted, and deconvoluted using XPS Peak 4.1 software to distinguish individual bonding environments.

## Elemental Analysis (ICP-OES)

Quantitative determination of iron content was performed using an Agilent 5900 inductively coupled plasma optical emission spectrometer (ICP-OES). For digestion, samples were first calcined at 650 °C for 1 h in a muffle furnace. The resulting ash was transferred to a PTFE crucible, treated with 8 mL HNO<sub>3</sub> and 3 mL HCl, and digested on a hotplate to near dryness. The digested solution was diluted to a final volume of 25 mL with deionized water prior to analysis.

## Electrochemical Measurements

The electrocatalytic activity of the synthesized catalysts toward the oxygen reduction reaction (ORR) was investigated using a CHI 1140A electrochemical workstation (CH Instruments) in a standard three-electrode cell configuration. Catalyst inks were prepared by dispersing 8.0 mg of catalyst in 3 mL ethanol and 0.2 mL of 5 wt% Nafion, followed by ultrasonication. A glassy carbon electrode (3 mm diameter) served as the working electrode, onto which 20 µL of catalyst ink was drop-cast and air-dried. A saturated calomel electrode (SCE) and Pt wire in saturated KCl solution were used as reference and counter electrodes\*\*, respectively, and connected via a salt bridge. Cyclic voltammetry (CV) was conducted in O<sub>2</sub>-saturated 0.5 M H<sub>2</sub>SO<sub>4</sub> at 25 °C, with a scan rate of 10 mV s<sup>-1</sup>. All potentials were referenced to the reversible hydrogen electrode (RHE) using the equation:

$$E(\text{V vs. RHE}) = E(\text{V vs. SCE}) + 0.241 + 0.0591 \times \text{pH, at } 25^\circ\text{C}$$

Linear sweep voltammetry (LSV) was performed using a rotating disk electrode (RDE-2, BASi Inc.) and the electron transfer number (*n*) for the oxygen reduction reaction (ORR) was estimated using the Koutecký–Levich equation as follows:

$$1/j = 1/j_k + 1/j_d = 1/j_k + 1 / ( 0.62 n F D_o^{2/3} \nu^{-1/6} C_o \omega^{1/2} )$$

In this model, *F* is the Faraday constant (96,485 C mol<sup>-1</sup>) while *j*, *j<sub>d</sub>*, and *j<sub>k</sub>* represent the overall measured current density, the diffusion-limited current density, and the kinetic current density, respectively. For experiments conducted in 0.5 M H<sub>2</sub>SO<sub>4</sub>, key parameters specific to the acidic medium were used: the oxygen diffusion coefficient (*D<sub>O</sub>*) is taken as 1.4 × 10<sup>-5</sup> cm<sup>2</sup> s<sup>-1</sup>, the solubility of oxygen (*C<sub>O</sub>*) is 1.26 × 10<sup>-6</sup> mol cm<sup>-3</sup>, and the kinematic viscosity (*ν*) is 0.01 cm<sup>2</sup> s<sup>-1</sup>. The electrode rotation speed (*ω*) was varied to generate Koutecký–Levich (K–L) plots, which relate *j*<sup>-1</sup> and *ω*<sup>-1/2</sup>. These plots were obtained from linear sweep voltammograms recorded at different rotation rates. The slope of each K–L line was then used to calculate the number of electrons involved in the ORR, providing insights into the underlying reaction mechanism in acidic conditions.

RRDE measurements were used to calculate the electron transfer number (*n*) and H<sub>2</sub>O<sub>2</sub> yield (%H<sub>2</sub>O<sub>2</sub>) using following equations:

$$\text{H}_2\text{O}_2\% = 200 \times \frac{I_r/N}{I_d + I_r/N}$$
$$n = 4 \times \frac{I_d}{I_d + I_r/N}$$

where *I<sub>d</sub>* is the disk current, *I<sub>r</sub>* is the ring current, and *N* is the collection efficiency (0.37) of the ring electrode. The geometric area of the RRDE was 0.2475 cm<sup>2</sup> for the disk and 0.188 cm<sup>2</sup> for the ring.

**\*\* Note:** A platinum wire was used as the counter electrode during electrochemical measurements. This choice is consistent with widely reported ORR studies on Fe–N–C catalysts [Tan et al., *Surf. Interfaces* 56, 105683 (2025); Liu et al., *J. Alloys Compd.* 1036, 182115 (2025); Wang et al., *Angew. Chem. Int. Ed.* 64, e202510671 (2025); Cui et al., *Ind. Chem. Mater.* 2, 634–643 (2024)]. Although

*Pt dissolution and redeposition have been discussed in the literature, such effects are negligible under the applied conditions. Therefore, the use of a Pt counter electrode does not affect the intrinsic activity evaluation of Fe-ZIF-8-PVP-1000.*

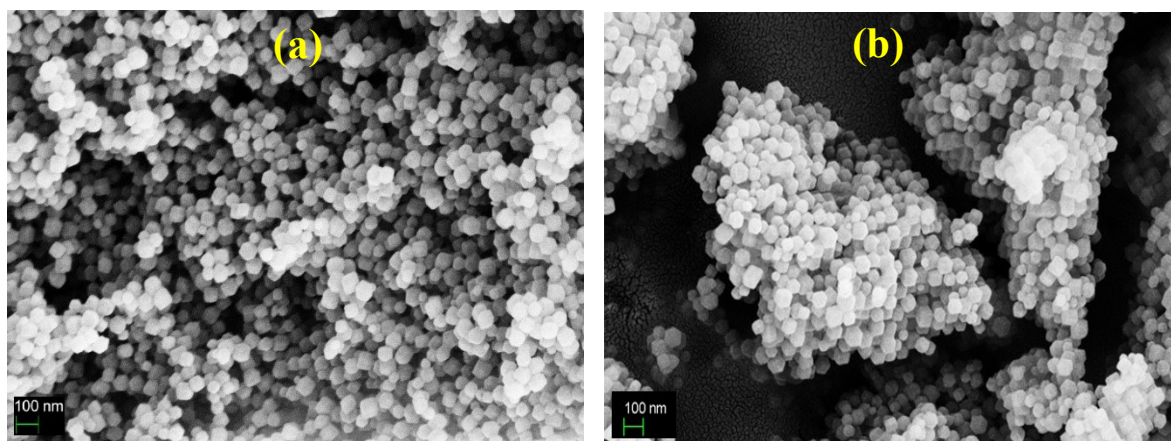

Figure S1. SEM images of (a) Fe-ZIF-8-PVP and (b) Fe-ZIF-8.

Table S1: Pore characteristics of the catalysts

| Parameter                                           | Fe-ZIF-8-PVP-1000 | Fe-ZIF-8-1000 |
|-----------------------------------------------------|-------------------|---------------|
| BET Surface Area (m <sup>2</sup> /g)                | 1579.8            | 177.3         |
| BJH Pore Volume (cm <sup>3</sup> /g)                | 0.382             | 0.573         |
| BJH Pore Diameter (nm)                              | 3.816             | 30.47         |
| BJH Mesopore Surface Area (m <sup>2</sup> /g)       | 109.7             | 100.5         |
| Micropore Volume (t-Plot) (cm <sup>3</sup> /g)      | 0.54              | 0.035         |
| Micropore Surface Area (t-Plot) (m <sup>2</sup> /g) | 645.5             | 7.9           |
| Micropore Volume (DR) (cm <sup>3</sup> /g)          | 0.642             | 0.077         |
| Average Pore Width (DR) (nm)                        | 1.44              | 2.15          |
| Adsorption Energy (DR) (kJ/mol)                     | 18.015            | 12.096        |
| Total Pore Volume (DFT) (cm <sup>3</sup> /g)        | 0.916             | 0.563         |
| Total Surface Area (DFT) (m <sup>2</sup> /g)        | 1747.3            | 148.2         |
| Pore Width Mode (DFT) (nm)                          | 0.548             | 14.636        |

Table S2. Comparison of ORR half-wave potentials in acid media between this study and previously reported iron-based catalysts.

| Catalyst                                | Electrolyte                          | E <sub>1/2</sub> vs RHE | Reference |
|-----------------------------------------|--------------------------------------|-------------------------|-----------|
| Fe-ZIF-8-PVP-1000                       | 0.5 M H <sub>2</sub> SO <sub>4</sub> | 0.865 V                 | This work |
| FePNC                                   | 0.5 M H <sub>2</sub> SO <sub>4</sub> | 0.76 V                  | (1)       |
| FeSNC                                   | 0.5 M H <sub>2</sub> SO <sub>4</sub> | 0.76 V                  | (2)       |
| RN350-Z(1-2)-1000                       | 0.1 M HClO <sub>4</sub>              | 0.723 V                 | (3)       |
| Fe-KJB-3-60A                            | 0.1 M HClO <sub>4</sub>              | 0.79 V                  | (4)       |
| Fe-Zn-SA/NC                             | 0.1 M HClO <sub>4</sub>              | 0.78 V                  | (5)       |
| 4.2-FeSA                                | 0.5 M H <sub>2</sub> SO <sub>4</sub> | 0.74 V                  | (6)       |
| Fe-NCs                                  | 0.5 M H <sub>2</sub> SO <sub>4</sub> | 0.83 V                  | (7)       |
| Fe-SA/PNC                               | 0.5 M H <sub>2</sub> SO <sub>4</sub> | 0.86 V                  | (8)       |
| FeMn <sub>ac</sub> /Mn-N <sub>4</sub> C | 0.5 M H <sub>2</sub> SO <sub>4</sub> | 0.79 V                  | (9)       |
| Fe SAs-Fe <sub>2</sub> P NPs/NPCFs-2.5  | 0.5 M H <sub>2</sub> SO <sub>4</sub> | 0.78 V                  | (10)      |
| Fe-P-NC                                 | 0.1 M HClO <sub>4</sub>              | 0.781 V                 | (11)      |
| Fe-AC-CVD                               | 0.5 M H <sub>2</sub> SO <sub>4</sub> | 0.846 V                 | (12)      |
| FeSA/FeAC-2DNPC                         | 0.5 M H <sub>2</sub> SO <sub>4</sub> | 0.81 V                  | (13)      |
| OM-Fe-N-C-steam                         | 0.1 M HClO <sub>4</sub>              | 0.81 V                  | (14)      |
| FeNC-CVD-750                            | 0.5 M H <sub>2</sub> SO <sub>4</sub> | 0.85 V                  | (15)      |
| Fe SAC-MOF-5                            | 0.5 M H <sub>2</sub> SO <sub>4</sub> | 0.83 V                  | (16)      |

|                           |                                      |         |      |
|---------------------------|--------------------------------------|---------|------|
| Fe-N-C                    | 0.5 M H <sub>2</sub> SO <sub>4</sub> | 0.82 V  | (17) |
| FeN <sub>4</sub> -C       | 0.5 M H <sub>2</sub> SO <sub>4</sub> | 0.82 V  | (18) |
| Fe@Fe-N-C                 | 0.1 M HClO <sub>4</sub>              | 0.829 V | (19) |
| Fe-N-C <sub>g</sub>       | 0.5 M H <sub>2</sub> SO <sub>4</sub> | 0.85 V  | (20) |
| Fe SAs-HP                 | 0.1 M HClO <sub>4</sub>              | 0.78 V  | (21) |
| FeN <sub>5</sub> -NHC     | 0.1 M HClO <sub>4</sub>              | 0.85 V  | (22) |
| Fe-N/Cl-C/HC              | 0.1 M HClO <sub>4</sub>              | 0.81 V  | (23) |
| Fe/FeN <sub>x</sub> -NC-1 | 0.5 M H <sub>2</sub> SO <sub>4</sub> | 0.8 V   | (24) |
| OM-Fe-NC(200)             | 0.5 M H <sub>2</sub> SO <sub>4</sub> | 0.885 V | (25) |
| Fe <sub>SA</sub> -NCc     | 0.5 M H <sub>2</sub> SO <sub>4</sub> | 0.836 V | (26) |
| Fe(Cd)-CN <sub>x</sub>    | 0.1 M HClO <sub>4</sub>              | 0.831 V | (27) |
| OP-Fe-NC                  | 0.5 M H <sub>2</sub> SO <sub>4</sub> | 0.89 V  | (28) |
| Cyan-Fe-N-C               | 0.5 M H <sub>2</sub> SO <sub>4</sub> | 0.836 V | (29) |

## References

1. H. Liu, L. Jiang, Y. Sun, J. Khan, B. Feng, J. Xiao, H. Zhang, H. Xie, L. Li, S. Wang, L. Han, Asymmetric N, P-coordinated single-atomic Fe sites with Fe<sub>2</sub>P nanoclusters/nanoparticles on porous carbon nanosheets for highly efficient oxygen electroreduction, *Adv. Energy Mater.*, 2023, 13, 2301223.
2. H. Liu, L. Jiang, Y. Sun, J. Khan, B. Feng, J. Xiao, H. Zhang, H. Xie, L. Li, S. Wang, L. Han, Revisiting the role of sulfur functionality in regulating the electron distribution of single-atomic Fe sites toward enhanced oxygen reduction, *Adv. Funct. Mater.*, 2023, 33, 2304074.
3. M. Hao, R. Dun, Y. Su, L. He, F. Ning, X. Zhou, W. Li, In situ self-doped biomass-derived porous carbon as an excellent oxygen reduction electrocatalyst for fuel cells and metal–air batteries, *J. Mater. Chem. A*, 2021, 9, 14331–14343.
4. M. Wang, B. Huang, N. Jiang, T. Liu, J. Huang, L. Guan, An Fe–N–C electrocatalyst with dense active sites synthesized by expeditious pyrolysis of a natural Fe–N<sub>4</sub> macrocyclic complex, *J. Mater. Chem. A*, 2022, 10, 23001–23007.
5. J. Xu, S. Lai, D. Qi, M. Hu, X. Peng, Y. Liu, W. Liu, G. Hu, H. Xu, F. Li, C. Li, J. He, L. Zhuo, J. Sun, Y. Qiu, S. Zhang, J. Luo, X. Liu, Atomic Fe–Zn dual-metal sites for high-efficiency pH-universal oxygen reduction catalysis, *Nano Res.*, 2021, 14, 1374–1381.
6. X. Wu, Q. Wang, S. Yang, J. Zhang, Y. Cheng, H. Tang, L. Ma, X. Min, C. Tang, S. P. Jiang, F. Wu, Y. Lei, S. Ciampi, S. Wang, L. Dai, Sublayer-enhanced atomic sites of single atom catalysts through in situ atomization of metal oxide nanoparticles, *Energy Environ. Sci.*, 2022, 15, 1183–1191.
7. S. Y. Yi, E. Choi, H. Y. Jang, S. Lee, J. Park, D. Choi, Y. Jang, H. Kang, S. Back, S. Jang, J. Lee, Insight into defect engineering of atomically dispersed iron electrocatalysts for high-performance proton exchange membrane fuel cell, *Adv. Mater.*, 2023, 35, 2302666.
8. W. Xue, Q. Zhou, X. Cui, J. Zhang, S. Zuo, F. Mo, J. Jiang, X. Zhu, Z. Lin, Atomically dispersed FeN<sub>2</sub>P<sub>2</sub> motif with high activity and stability for oxygen reduction reaction over the entire pH range, *Angew. Chem. Int. Ed.*, 2023, 62, e202307504.
9. H. Liu, L. Jiang, J. Khan, X. Wang, J. Xiao, H. Zhang, H. Xie, L. Li, S. Wang, L. Han, Decorating single-atomic Mn sites with FeMn clusters to boost oxygen reduction reaction, *Angew. Chem. Int. Ed.*, 2023, 135, e202214988.
10. Y. Pan, X. Ma, M. Wang, X. Yang, S. Liu, H. Chen, Z. Zhuang, Y. Zhang, W. Cheong, C. Zhang, X. Cao, R. Shen, Q. Xu, W. Zhu, Y. Liu, X. Wang, X. Zhang, W. Yan, J. Li, H. Chen, C. Chen, Y. Li, Construction of N, P co-doped carbon frames anchored with Fe single atoms and Fe<sub>2</sub>P nanoparticles as a robust coupling catalyst for electrocatalytic oxygen reduction, *Adv. Mater.*, 2022, 34, 2203621.
11. H. Jin, R. Yu, P. Ji, W. Zeng, Z. Li, D. He, S. Mu, Sharply expanding single-atomically dispersed Fe–N active sites through bidirectional coordination for oxygen reduction, *Chem. Sci.*, 2024, 15, 7259–7268.
12. S. Liu, C. Li, M. J. Zachman, Y. Zeng, H. Yu, B. Li, M. Wang, J. Braaten, J. Liu, H. M. Meyer, M. Lucero, A. J. Kropf, E. E. Alp, Q. Gong, Q. Shi, Z. Feng, H. Xu, G. Wang, D. J. Myers, J. Xie, D. A. Cullen, S. Litster, G. Wu, Atomically dispersed iron sites with a nitrogen–carbon coating as highly active and durable oxygen reduction catalysts for fuel cells, *Nat. Energy*, 2022, 7, 652–663.



13. X. Wan, Q. Liu, J. Liu, S. Liu, X. Liu, L. Zheng, J. Shang, R. Yu, J. Shui, Iron atom–cluster interactions increase activity and improve durability in Fe–N–C fuel cells, *Nat. Commun.*, 2022, 13, 2963.
14. J. Zou, C. Chen, Y. Chen, Y. Zhu, Q. Cheng, L. Zou, Z. Zou, H. Yang, Facile steam-etching approach to increase the active site density of an ordered porous Fe–N–C catalyst to boost oxygen reduction reaction, *ACS Catal.*, 2022, 12, 4517–4525.
15. L. Jiao, J. Li, L. L. Richard, Q. Sun, T. Stracensky, E. Liu, M. T. Sougrati, Z. Zhao, F. Yang, S. Zhong, H. Xu, S. Mukerjee, Y. Huang, D. A. Cullen, J. H. Park, M. Ferrandon, D. J. Myers, F. Jaouen, Q. Jia, Chemical vapour deposition of Fe–N–C oxygen reduction catalysts with full utilization of dense Fe–N<sub>4</sub> sites, *Nat. Mater.*, 2021, 20, 1385–1391.
16. J. Yan, H. Li, K. Wang, Q. Jin, C. Lai, R. Wang, S. Cao, J. Han, Z. Zhang, J. Su, K. Jiang, Ultrahigh phosphorus doping of carbon for high-rate sodium ion batteries anode, *Adv. Energy Mater.*, 2021, 11, 2003911.
17. F. Xiao, X. Liu, C.-J. Sun, I. Hwang, Q. Wang, Z. Xu, Y. Wang, S. Zhu, H.-W. Wu, Z. Wei, L. Zheng, D. Cheng, M. Gu, G.-L. Xu, K. Amine, M. Shao, Solid-state synthesis of highly dispersed nitrogen-coordinated single iron atom electrocatalysts for proton exchange membrane fuel cells, *Nano Lett.*, 2021, 21, 3633–3639.
18. G. Chen, R. Lu, C. Li, J. Yu, X. Li, L. Ni, Q. Zhang, G. Zhu, S. Liu, J. Zhang, U. I. Kramm, Y. Zhao, G. Wu, J. Xie, X. Feng, Hierarchically porous carbons with highly curved surfaces for hosting single metal FeN<sub>4</sub> sites as outstanding oxygen reduction catalysts, *Adv. Mater.*, 2023, 35, 2300907.
19. Z. Lin, J. Liu, S. Li, J. Liang, X. Liu, L. Xie, G. Lu, J. Han, Y. Huang, Q. Li, Anticorrosive SnS<sub>2</sub>/SnO<sub>2</sub> heterostructured support for Pt nanoparticles enables remarkable oxygen reduction catalysis via interfacial enhancement, *Adv. Funct. Mater.*, 2023, 33, 2211638.
20. L. Jiao, T. A. Arman, S. Hwang, J. Fonseca, N. Okolie, E. Shaaban, G. Li, E. Liu, U. Pasaogullari, S. K. Babu, S. Mukerjee, J. S. Spendelow, D. A. Cullen, F. Jaouen, Q. Jia, Self-sacrificial template synthesis of Fe–N–C catalysts with dense active sites deposited on a porous carbon network for high performance in PEMFC, *Adv. Energy Mater.*, 2024, 14, 2303952.
21. P. Zhang, H.-C. Chen, H. Zhu, et al., Inter-site structural heterogeneity induction of single atom Fe catalysts for robust oxygen reduction, *Nat. Commun.*, 2024, 15, 2062.
22. D. Shen, F. Sun, Z. Liang, H. Fu, L. Wang, Axial-N induced square-pyramidal crystal field of atomically iron sites for enhancing acidic oxygen reduction, *Angew. Chem. Int. Ed.*, 2025, e202505937.
23. J. Xu, Y. Meng, X. Qiu, H. Zhong, S. Liu, L. Zhang, J. Zhang, P. Hou, S. P. Beckman, F. Wu, C. Liu, M. Shao, J. Li, Honeycomb-like single-atom catalysts with FeN<sub>3</sub>Cl sites for high-performance oxygen reduction, *Adv. Powder Mater.*, 2025, 4, 100298.
24. J.-F. Gu, J. Wang, C. Wang, J. Li, C. Chen, N. Zhang, X.-Y. Xu, S. Chaemchuen, Two-dimensional ZIF-L derived dual Fe/FeN<sub>x</sub> sites for synergistic efficient oxygen reduction in alkaline and acid media, *J. Colloid Interface Sci.*, 2025, 684, 159–169.
25. Y. Liu, Q. Li, Y. Liang, J. Liang, X. Sui, Z. Wang, Controlled preparation of Fe–N–C catalyst with ordered macroporous framework for superior acidic oxygen reduction performance, *J. Alloys Compd.*, 2025, 1036, 182115.

26. Y. Liu, G. Li, M. Chen, Y. Liu, T. Qiu, X. Han, J. Li, R. Li, X. Shi, Z. Kang, Q. Pan, X. Tian, P. Rao, Curved Fe–N<sub>4</sub> sites endow effective oxygen reduction reaction in acid medium, *Chem. Eng. J.*, 2025, 521, 167202.
27. T. Zhou, Y. Guan, C. He, et al., Building Fe atom–cluster composite sites using a site occupation strategy to boost electrochemical oxygen reduction, *Carbon Energy*, 2024, 6, e477.
28. J. Li, W. Xia, X. Xu, D. Jiang, Z.-X. Cai, J. Tang, Y. Guo, X. Huang, T. Wang, J. He, B. Han, Y. Yamauchi, Sharply expanding single-atomically dispersed Fe–N active sites through bidirectional coordination for oxygen reduction, *J. Am. Chem. Soc.*, 2023, 145, 50, 27262–27272.
29. L. J. Yuan, B. Liu, L. X. Shen, Y. K. Dai, Q. Li, C. Liu, W. Gong, X. L. Sui, Z. B. Wang, d-Orbital electron delocalization realized by axial Fe<sub>4</sub>C atomic clusters delivers high-performance Fe–N–C catalysts for oxygen reduction reaction, *Adv. Mater.*, 2023, 35, 2305945.
